# Supplementary material for: Anti-obesity effects ofGrifola frondosathrough the modulation of lipid metabolismviaceramide in mice fed a high-fat diet
Source: Royal Society of Chemistry journal article supplement (doi:10.1039/d1fo00666e), 2021-01-01
Supplement: d1fo00666e1.pdf [file d1fo00666e1.pdf]

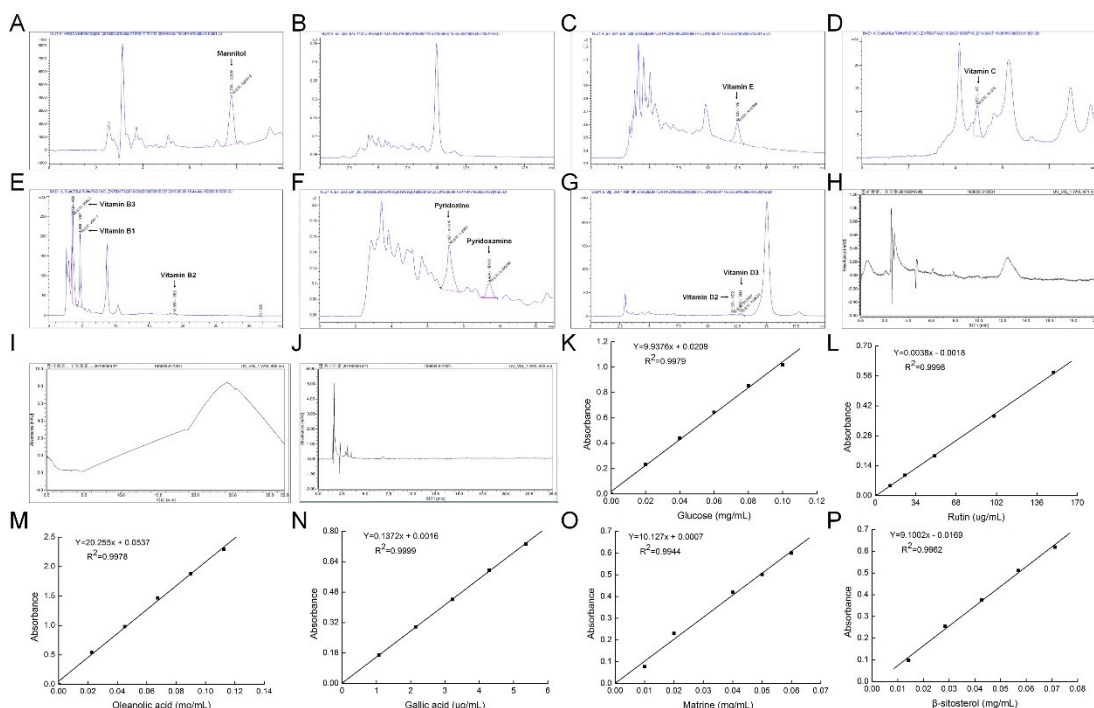

**Figure S1** HPLC chromatograms of GF for analyzing (A) mannitol; (B) vitamin A; (C) vitamin E; (D) vitamin C; (E) vitamin B1, B2 and B3; (F) vitamin B6; (G) vitamin D; (H) canthaxanthin and astaxanthin; (I) lutein and zeaxanthin, and (J) lycopene. Standard curve of (K) glucose, (L) rutin, (M) oleoic acid, (N) gallic acid, (O) matrine and (P) β-sitosterol using for analyzing their content of GF.

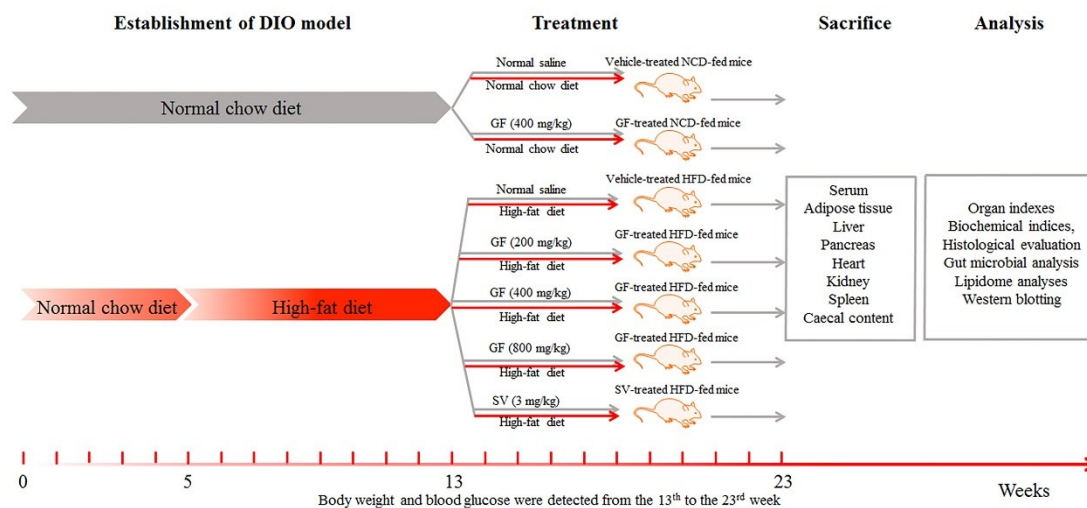

**Figure S2** The process of establishing the DIO model and administering the drugs.

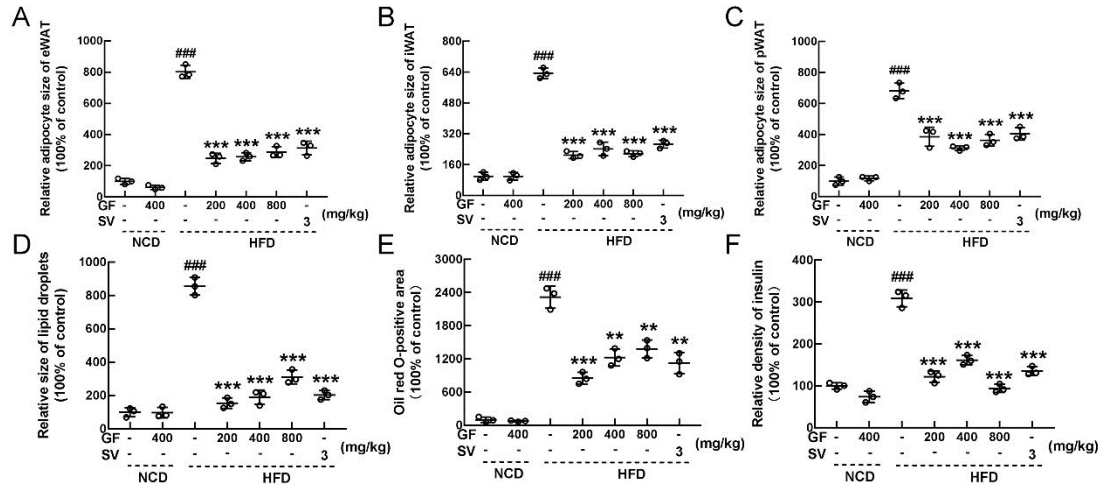

**Figure S3** Adipocyte size in (A) eWAT, (B) iWAT and (C) pWAT according to representative H&E-staining results in Fig. 1H-J. (D) The relative size of lipid droplets and (E) quantification of the oil red O-positive area in the liver, according to representative H&E staining results in Fig. 2I and oil red O staining in Fig. 2J. (F) The relative levels of insulin in the pancreas, according to immunohistochemistry results in Fig. 3Q. Data were analyzed using a one-way ANOVA and are expressed as the means  $\pm$  S.E.M. (n = 3). ###  $p < 0.001$  versus vehicle-treated NCD-fed mice; \*\*  $p < 0.01$  and \*\*\*  $p < 0.001$  versus vehicle-treated HFD-fed mice.

**Table S1** Primary antibodies used for immunohistochemistry and western blotting.

| Name                                     | Item number | Molecular Weight (kDa) | Dilution rate |
|------------------------------------------|-------------|------------------------|---------------|
| Insulin <sup>a</sup>                     | ab181547    | 12                     | 1/20000       |
| TLR4 <sup>a</sup>                        | ab217274    | 90                     | 1/300         |
| MyD88 <sup>b</sup>                       | bs-1047R    | 34                     | 1/2000        |
| TRAF6 <sup>a</sup>                       | ab33915     | 58                     | 1/2000        |
| p-IKK( $\alpha$ + $\beta$ ) <sup>a</sup> | ab194528    | 85                     | 1/2000        |
| t-IKK( $\alpha$ + $\beta$ ) <sup>a</sup> | ab55341     | 85                     | 1/2000        |
| p-I $\kappa$ B $\alpha$ <sup>a</sup>     | ab133462    | 35                     | 1/2000        |
| t-I $\kappa$ B $\alpha$ <sup>a</sup>     | ab32518     | 36                     | 1/2000        |
| p-NF- $\kappa$ B <sup>a</sup>            | ab76302     | 65                     | 1/2000        |
| t-NF- $\kappa$ B <sup>a</sup>            | ab32536     | 65                     | 1/2000        |
| IL-6 <sup>a</sup>                        | ab214429    | 23                     | 1/1000        |
| TNF- $\alpha$ <sup>c</sup>               | 3707S       | 20                     | 1/1000        |
| NLRP3 <sup>a</sup>                       | ab263899    | 118                    | 1/1000        |
| caspase 1 <sup>a</sup>                   | ab74279     | 45                     | 1/2000        |
| IL-1 $\beta$ <sup>b</sup>                | bs-0812R    | 17                     | 1/2000        |
| PP2A <sup>a</sup>                        | ab32104     | 35                     | 1/5000        |
| p-PKC <sup>a</sup>                       | ab75837     | 77                     | 1/5000        |
| t-PKC <sup>a</sup>                       | ab32376     | 77                     | 1/2000        |
| GAPDH <sup>a</sup>                       | ab181602    | 36                     | 1/500         |

<sup>a</sup> Antibodies were purchased from Abcam (Shanghai, China). <sup>b</sup> Antibody were purchased from Bioss (Beijing, China). <sup>c</sup> Antibodies were purchased from Cell Signaling Technology, Inc. (Shanghai, China).

**Table S2** The effects of GF on body weights, plasma glucose, food and water intakes, and organ indices.

|                         | week   | NCD         | NCD +400 mg/kg GF | HFD            | HFD+200 mg/kg GF | HFD+400 mg/kg GF | HFD+800 mg/kg GF | HFD+3 mg/kg SV |
|-------------------------|--------|-------------|-------------------|----------------|------------------|------------------|------------------|----------------|
| Body weights (g)        | 0      | 24.23±0.24  | 24.68±0.23        | 32.69±0.57###  | 32.35±0.52       | 33.69±0.54       | 33.81±0.41       | 33.66±0.76     |
|                         | 2      | 25.06±0.32  | 24.26±0.39        | 32.87±0.54###  | 31.69±0.30       | 31.78±0.39       | 31.69±0.47       | 33.88±0.79     |
|                         | 4      | 25.89±0.26  | 23.90±0.51##      | 38.22±0.78###  | 31.62±0.56***    | 32.44±0.62***    | 32.30±0.47***    | 35.26±0.92*    |
|                         | 6      | 26.36±0.32  | 24.37±0.31##      | 44.36±0.89###  | 33.09±0.67***    | 34.31±0.60***    | 34.79±0.64***    | 39.44±0.84**   |
|                         | 8      | 27.15±0.35  | 24.53±0.46###     | 47.69±0.76###  | 35.90±0.93***    | 38.03±0.58***    | 37.45±0.78***    | 43.10±0.94**   |
|                         | 10     | 27.59±0.29  | 25.73±0.73#       | 49.66±0.58###  | 38.99±0.94***    | 41.48±0.62***    | 40.55±0.88***    | 46.29±0.89**   |
| Plasma glucose (mmol/L) | 0      | 7.7±0.5     | 7.4±0.3           | 11.8±0.4###    | 11.6±0.3         | 11.3±0.2         | 11.9±0.3         | 11.5±0.3       |
|                         | 2      | 10.1±0.3    | 10.2±0.5          | 12.1±0.6##     | 10.7±0.3         | 10.7±0.5         | 10.6±0.4         | 13.1±0.3       |
|                         | 4      | 9.5±0.3     | 9.6±0.7           | 14.4±0.4###    | 11.1±0.4***      | 10.2±0.5***      | 10.4±0.3***      | 13.0±0.3**     |
|                         | 6      | 9.2±0.2     | 8.5±0.4           | 14.0±0.4###    | 9.4±0.4***       | 10.2±0.4***      | 9.9±0.4***       | 10.6±0.3***    |
|                         | 8      | 8.1±0.3     | 8.9±0.8           | 12.2±0.2###    | 10.7±0.2***      | 11.2±0.4*        | 11.1±0.3**       | 12.8±0.4       |
|                         | 10     | 9.1±0.3     | 9.8±0.5           | 13.3±0.3###    | 9.7±0.4***       | 10.6±0.4***      | 10.1±0.5***      | 12.0±0.3*      |
| Intakes (g/10g)         | Food   | 0.83±0.03   | 0.79±0.09         | 0.84±0.08      | 0.78±0.06        | 0.94±0.13        | 0.77±0.02        | 0.78±0.10      |
|                         | Water  | 2.45±0.21   | 2.10±0.67         | 1.95±0.23      | 2.36±0.32        | 2.53±0.64        | 2.13±0.48        | 1.99±0.13      |
| Organ indices (%)       | Spleen | 0.238±0.006 | 0.243±0.009       | 0.178±0.004### | 0.194±0.004*     | 0.195±0.005*     | 0.188±0.010      | 0.172±0.005    |
|                         | Kidney | 1.226±0.018 | 1.219±0.045       | 0.743±0.017### | 0.871±0.0319***  | 0.891±0.0319***  | 0.849±0.0339**   | 0.809±0.0239*  |
|                         | Heart  | 0.573±0.018 | 0.552±0.015       | 0.401±0.014### | 0.494±0.041*     | 0.420±0.019      | 0.405±0.012      | 0.408±0.010    |

Data were analyzed using a one-way ANOVA and are expressed as the means ± S.E.M. (n = 6). #  $p < 0.05$ , ##  $p < 0.01$  and ###  $p < 0.001$  versus vehicle-treated NCD-fed mice; \*  $p < 0.05$ , \*\*  $p < 0.01$  and \*\*\*  $p < 0.001$  versus vehicle-treated HFD-fed mice.

**Table S3** Basic information of the 11 significantly upregulated or downregulated metabolites by GF among experimental groups.

| Class                                       | Mean of<br>vehicle-treated<br>NCD mice | Mean of<br>vehicle-treated<br>HFD mice | Mean of<br>GF (800 mg/kg)-treated<br>HFD mice | vehicle-treated                 |           |       | GF (800 mg/kg)-treated          |           |       |
|---------------------------------------------|----------------------------------------|----------------------------------------|-----------------------------------------------|---------------------------------|-----------|-------|---------------------------------|-----------|-------|
|                                             |                                        |                                        |                                               | HFD mice versus vehicle-treated |           |       | HFD mice versus vehicle-treated |           |       |
|                                             |                                        |                                        |                                               | NCD mice                        |           |       | HFD mice                        |           |       |
|                                             |                                        |                                        |                                               | P value                         | log2 (fc) | VIP   | P value                         | log2 (fc) | VIP   |
| Upregulated metabolites by GF (Number: 2)   |                                        |                                        |                                               |                                 |           |       |                                 |           |       |
| LPC (19:0)                                  | 0.150                                  | 0.067                                  | 0.105                                         | 0.000                           | -1.156    | 1.440 | 0.023                           | 0.641     | 1.707 |
| TG (16:0_16:0_17:0)                         | 0.109                                  | 0.003                                  | 0.094                                         | 0.000                           | -5.326    | 1.448 | 0.019                           | 5.107     | 1.729 |
| Downregulated metabolites by GF (Number: 9) |                                        |                                        |                                               |                                 |           |       |                                 |           |       |
| Cer (d18:0_20:0+O)                          | 4.504                                  | 10.082                                 | 6.240                                         | 0.001                           | 1.163     | 1.416 | 0.003                           | -0.692    | 1.864 |
| PC (35:0)                                   | 0.014                                  | 0.019                                  | 0.011                                         | 0.022                           | 0.448     | 1.273 | 0.028                           | -0.762    | 1.683 |
| PC (18:0_20:4)                              | 0.102                                  | 0.513                                  | 0.386                                         | 0.000                           | 2.325     | 1.435 | 0.035                           | -0.408    | 1.650 |
| PS (39:4)                                   | 0.823                                  | 4.150                                  | 2.463                                         | 0.001                           | 2.334     | 1.426 | 0.017                           | -0.753    | 1.744 |
| PS (18:0_22:6)                              | 0.003                                  | 2.385                                  | 1.314                                         | 0.001                           | 9.776     | 1.417 | 0.029                           | -0.860    | 1.678 |
| SM (d40:7)                                  | 0.003                                  | 0.115                                  | 0.003                                         | 0.000                           | 5.396     | 1.446 | 0.000                           | -5.396    | 1.945 |
| D5TG (16:0_18:2_18:0)                       | 1.071                                  | 1.294                                  | 1.070                                         | 0.037                           | 0.272     | 1.220 | 0.024                           | -0.274    | 1.705 |
| TG (18:1_20:2_22:4)                         | 0.003                                  | 0.100                                  | 0.023                                         | 0.002                           | 5.198     | 1.400 | 0.035                           | -2.118    | 1.649 |
| ZyE (20:2)                                  | 0.003                                  | 46.082                                 | 12.487                                        | 0.000                           | 14.048    | 1.453 | 0.007                           | -1.884    | 1.823 |

log2 (fc): log2 (fold change); VIP: variable importance for the projection of orthogonal partial least squares discriminant analysis (OPLS-DA).
